# Supplementary material for: Probing the nature of Lewis acid sites on oxide surfaces with 31P(CH3)3 NMR: a theoretical analysis
Source: Royal Society of Chemistry journal article supplement (doi:10.1039/d2cp03306b), 2022-01-01
Supplement: d2cp03306b1.pdf [file d2cp03306b1.pdf]

## Supporting information

### Probing the nature of Lewis acid sites on oxide surfaces with $^{31}\text{P}(\text{CH}_3)_3$ NMR: A theoretical analysis

Farahnaz Maleki and Gianfranco Pacchioni\*

*Dipartimento di Scienza dei Materiali, Università di Milano-Bicocca, via R. Cozzi 55, 20125  
Milano, Italy*

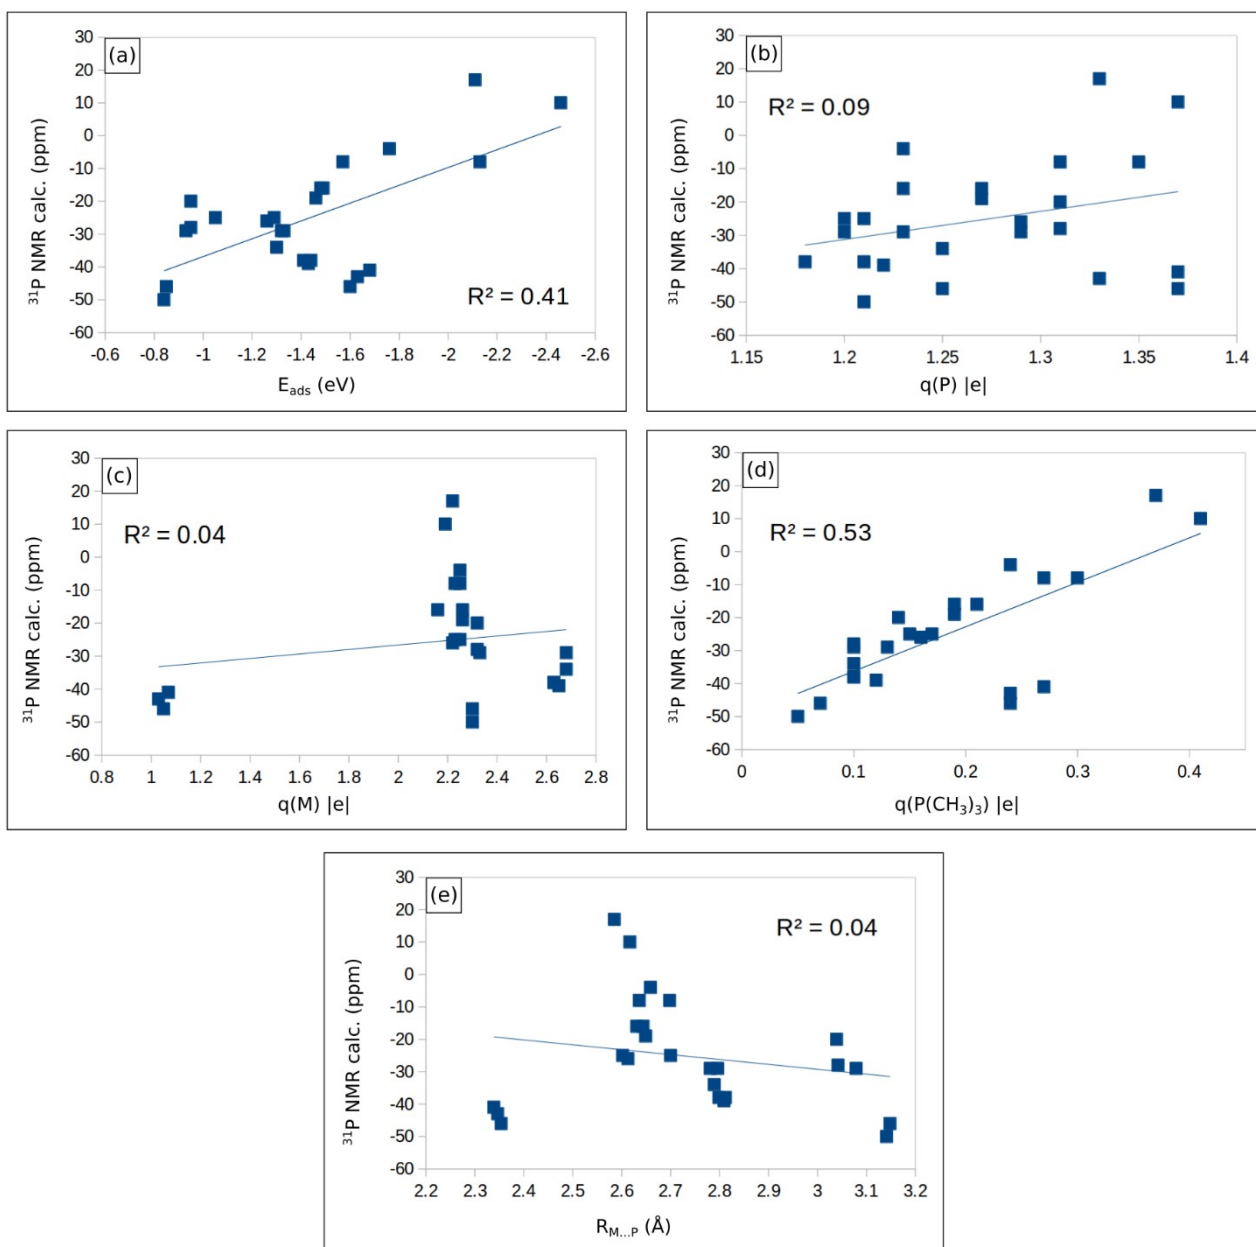

Figure S1 – Plot of computed  $^{31}\text{P}$  chemical shift versus (a) adsorption energy,  $E_{\text{ads}}$ , (b) charge on P atom as obtained from Bader analysis,  $q_{\text{P}}$ , (c) charge on the surface cation where the TMP molecule is adsorbed,  $q_{\text{M}\dots\text{P}}$ , (d) net charge on the whole TMP molecule,  $q_{\text{P}(\text{CH}_3)_3}$ , (e) cation-P distance,  $R_{\text{M}\dots\text{P}}$ , see also Table 1. All data included.

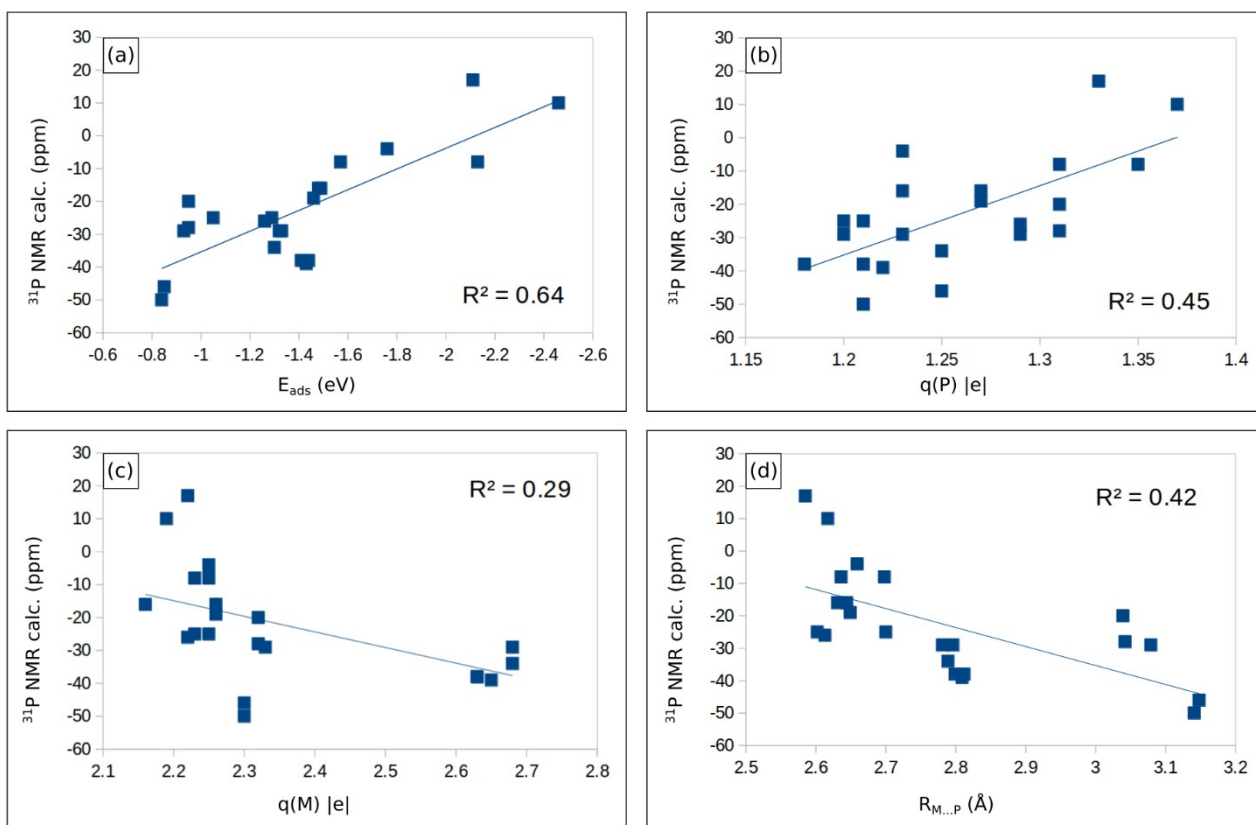

Figure S2 – Plot of computed  $^{31}\text{P}$  chemical shift versus (a) adsorption energy,  $E_{\text{ads}}$ , (b) charge on P atom as obtained from Bader analysis,  $q_{\text{P}}$ , (c) charge on the surface cation where the TMP molecule is adsorbed,  $q_{\text{M}\dots\text{P}}$ , (d) net charge on the whole TMP molecule,  $q_{\text{P}(\text{CH}_3)_3}$ , (e) cation-P distance,  $R_{\text{M}\dots\text{P}}$ , see also Table 1. Data referred to ZnO not included.

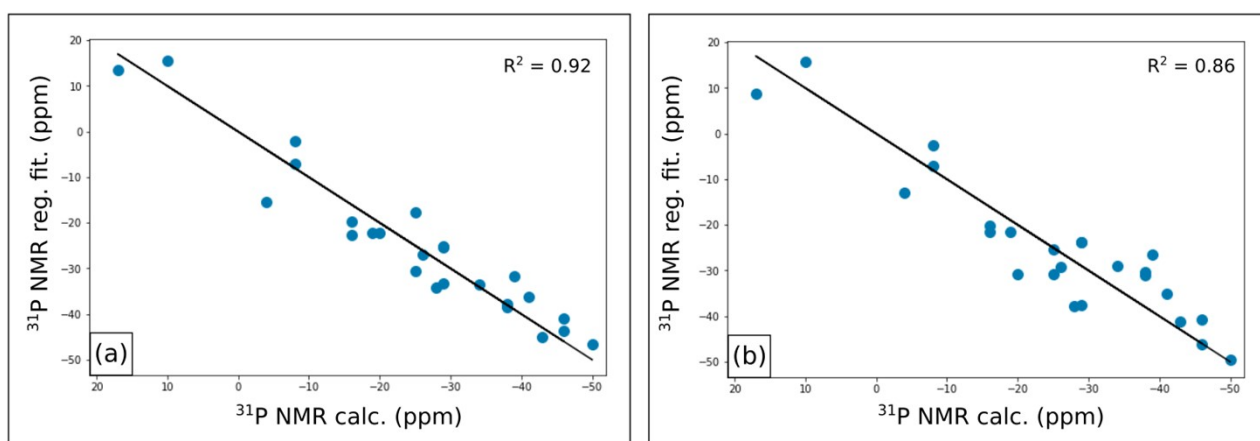

Figure S3 - Correlation between  $^{31}\text{P}$  NMR calculated and regression fitted by considering (a) adsorption energy ( $E_{\text{ads}}$ ) and Bader charges ( $q_{\text{P}(\text{CH}_3)_3}$ ) and  $q_{\text{M}}$ ) and (b) work functions ( $\Phi$ ) and Bader charges ( $q_{\text{P}(\text{CH}_3)_3}$ ) and  $q_{\text{M}}$ ), see Table 1.

Table S1. The coefficients of regression models for normalized set of data shown in Figure S3.

|         | <b>a</b> | <b>b</b> | <b>c</b> |
|---------|----------|----------|----------|
| Fig S3a | 0.62     | 0.75     | 1.61     |
| Fig S3b | 0.08     | 0.60     | 0.95     |
